# Supplementary material for: A Small Molecule That Promotes Cellular Senescence Prevents Fibrogenesis and Tumorigenesis
Source: MDPI journal article supplement (doi:10.3390/ijms23126852), 2022-06-20
Supplement: s1 [file s1]

| GeneName         | Desc                                                                        | log2fc | p-value  | q-value |
|------------------|-----------------------------------------------------------------------------|--------|----------|---------|
| <b>NRP1</b>      | neuropilin 1                                                                | -2.78  | 5.00E-05 | 0.0159  |
| <b>MMP1</b>      | matrix metalloproteinase 1 (interstitial collagenase)                       | -3.12  | 5.00E-05 | 0.0159  |
| <b>FARP1</b>     | FERM, RhoGEF (ARHGEF) and pleckstrin domain protein 1 (chondrocyte-derived) | -2.53  | 5.00E-05 | 0.0159  |
| <b>THSD4</b>     | thrombospondin, type I, domain containing 4                                 | -4.56  | 5.00E-05 | 0.0159  |
| <b>NPTX1</b>     | neuronal pentraxin I                                                        | -3.84  | 5.00E-05 | 0.0159  |
| <b>SLC14A1</b>   | solute carrier family 14 (urea transporter), member 1 (Kidd blood group)    | -4.74  | 5.00E-05 | 0.0159  |
| <b>CCBE1</b>     | collagen and calcium binding EGF domains 1                                  | -3.14  | 5.00E-05 | 0.0159  |
| <b>SPPL2B</b>    | signal peptide peptidase like 2B                                            |        | 5.00E-05 | 0.0159  |
| <b>TBC1D5</b>    | TBC1 domain family, member 5                                                | -3.66  | 5.00E-05 | 0.0159  |
| <b>ABI3BP</b>    | ABI family, member 3 (NESH) binding protein                                 | -2.92  | 5.00E-05 | 0.0159  |
| <b>PTX3</b>      | pentraxin 3, long                                                           | -4.05  | 5.00E-05 | 0.0159  |
| <b>LPP</b>       | LIM domain containing preferred translocation partner in lipoma             | -3.72  | 5.00E-05 | 0.0159  |
| <b>SCFD2</b>     | sec1 family domain containing 2                                             | -3.73  | 5.00E-05 | 0.0159  |
| <b>MAPK10</b>    | mitogen-activated protein kinase 10                                         | -3.12  | 5.00E-05 | 0.0159  |
| <b>CAMK2D</b>    | calcium/calmodulin-dependent protein kinase II delta                        | -3.02  | 5.00E-05 | 0.0159  |
| <b>RPS6KA2</b>   | ribosomal protein S6 kinase, 90kDa, polypeptide 2                           | -2.77  | 5.00E-05 | 0.0159  |
| <b>ANLN</b>      | anillin, actin binding protein                                              | -2.75  | 5.00E-05 | 0.0159  |
| <b>CACNA2D1</b>  | calcium channel, voltage-dependent, alpha 2/delta subunit 1                 | -3.13  | 5.00E-05 | 0.0159  |
| <b>EXOC4</b>     | exocyst complex component 4                                                 | -3.14  | 5.00E-05 | 0.0159  |
| <b>TNFRSF11B</b> | tumor necrosis factor receptor superfamily, member 11b                      | -2.72  | 5.00E-05 | 0.0159  |
| <b>PRUNE2</b>    | prune homolog 2 (Drosophila)                                                | -2.54  | 5.00E-05 | 0.0159  |

**Supple. Table S1**

# Metabolic shift / Histone modification

A)

Collagen And Calcium Binding EGF Domains 1

**metabolism**

Pyruvate Dehydrogenase Kinase 1

Endothelial PAS Domain Protein 1

Matrix Metalloproteinase 1

TNF Receptor Superfamily Member 11b (OPG)

Serpin Family B Member 2

SERPINF2

RAB GTPase Activating Protein 1 Like

ACTG2

Formin 1

Thrombomodulin

FMN1

ANLN

Ribosomal Protein S6 Kinase A2

RPS6KA2

MKI67

Marker Of Proliferation Ki-67

PRKCA

Protein Kinase C Alpha

PDE1A

AK5

Adenylate Kinase

PPAP2B

LPP

HMG2

High Mobility Group AT-Hook 2

RAPGEF4

MAPK10

Phosphodiesterase 5A

PDE5A

H1.3 Linker Histone, Cluster Member

Mitogen-Activated Protein Kinase 10

ACTG2

Formin 1

FMN1

ANLN

Ribosomal Protein S6 Kinase A2

RPS6KA2

MKI67

Marker Of Proliferation Ki-67

PRKCA

Protein Kinase C Alpha

PDE1A

AK5

Adenylate Kinase

PPAP2B

LPP

HMG2

High Mobility Group AT-Hook 2

RAPGEF4

MAPK10

Phosphodiesterase 5A

PDE5A

H1.3 Linker Histone, Cluster Member

Mitogen-Activated Protein Kinase 10

ACTG2

Formin 1

FMN1

ANLN

Ribosomal Protein S6 Kinase A2

RPS6KA2

MKI67

Marker Of Proliferation Ki-67

PRKCA

Protein Kinase C Alpha

PDE1A

AK5

Adenylate Kinase

PPAP2B

LPP

HMG2

High Mobility Group AT-Hook 2

RAPGEF4

MAPK10

Phosphodiesterase 5A

PDE5A

H1.3 Linker Histone, Cluster Member

Mitogen-Activated Protein Kinase 10

ACTG2

Formin 1

FMN1

ANLN

Ribosomal Protein S6 Kinase A2

RPS6KA2

MKI67

Marker Of Proliferation Ki-67

PRKCA

Protein Kinase C Alpha

PDE1A

AK5

Adenylate Kinase

PPAP2B

LPP

HMG2

High Mobility Group AT-Hook 2

RAPGEF4

MAPK10

Phosphodiesterase 5A

PDE5A

H1.3 Linker Histone, Cluster Member

Mitogen-Activated Protein Kinase 10

ACTG2

Formin 1

FMN1

ANLN

Ribosomal Protein S6 Kinase A2

RPS6KA2

MKI67

Marker Of Proliferation Ki-67

PRKCA

Protein Kinase C Alpha

PDE1A

AK5

Adenylate Kinase

PPAP2B

LPP

HMG2

High Mobility Group AT-Hook 2

RAPGEF4

MAPK10

Phosphodiesterase 5A

PDE5A

H1.3 Linker Histone, Cluster Member

Mitogen-Activated Protein Kinase 10

ACTG2

Formin 1

FMN1

ANLN

Ribosomal Protein S6 Kinase A2

RPS6KA2

MKI67

Marker Of Proliferation Ki-67

PRKCA

Protein Kinase C Alpha

PDE1A

AK5

Adenylate Kinase

PPAP2B

LPP

HMG2

High Mobility Group AT-Hook 2

RAPGEF4

MAPK10

Phosphodiesterase 5A

PDE5A

H1.3 Linker Histone, Cluster Member

Mitogen-Activated Protein Kinase 10

ACTG2

Formin 1

FMN1

ANLN

Ribosomal Protein S6 Kinase A2

RPS6KA2

MKI67

Marker Of Proliferation Ki-67

PRKCA

Protein Kinase C Alpha

PDE1A

AK5

Adenylate Kinase

PPAP2B

LPP

HMG2

High Mobility Group AT-Hook 2

RAPGEF4

MAPK10

Phosphodiesterase 5A

PDE5A

H1.3 Linker Histone, Cluster Member

Mitogen-Activated Protein Kinase 10

ACTG2

Formin 1

FMN1

ANLN

Ribosomal Protein S6 Kinase A2

RPS6KA2

MKI67

Marker Of Proliferation Ki-67

PRKCA

Protein Kinase C Alpha

PDE1A

AK5

Adenylate Kinase

PPAP2B

LPP

HMG2

High Mobility Group AT-Hook 2

RAPGEF4

MAPK10

Phosphodiesterase 5A

PDE5A

H1.3 Linker Histone, Cluster Member

Mitogen-Activated Protein Kinase 10

ACTG2

Formin 1

FMN1

ANLN

Ribosomal Protein S6 Kinase A2

RPS6KA2

MKI67

Marker Of Proliferation Ki-67

PRKCA

Protein Kinase C Alpha

PDE1A

AK5

Adenylate Kinase

PPAP2B

LPP

HMG2

High Mobility Group AT-Hook 2

RAPGEF4

MAPK10

Phosphodiesterase 5A

PDE5A

H1.3 Linker Histone, Cluster Member

Mitogen-Activated Protein Kinase 10

ACTG2

Formin 1

FMN1

ANLN

Ribosomal Protein S6 Kinase A2

RPS6KA2

MKI67

Marker Of Proliferation Ki-67

PRKCA

Protein Kinase C Alpha

PDE1A

AK5

Adenylate Kinase

PPAP2B

LPP

HMG2

High Mobility Group AT-Hook 2

RAPGEF4

MAPK10

Phosphodiesterase 5A

PDE5A

H1.3 Linker Histone, Cluster Member

Mitogen-Activated Protein Kinase 10

ACTG2

Formin 1

FMN1

ANLN

Ribosomal Protein S6 Kinase A2

RPS6KA2

MKI67

Marker Of Proliferation Ki-67

PRKCA

Protein Kinase C Alpha

PDE1A

AK5

Adenylate Kinase

PPAP2B

LPP

HMG2

High Mobility Group AT-Hook 2

RAPGEF4

MAPK10

Phosphodiesterase 5A

PDE5A

H1.3 Linker Histone, Cluster Member

Mitogen-Activated Protein Kinase 10

ACTG2

Formin 1

FMN1

ANLN

Ribosomal Protein S6 Kinase A2

RPS6KA2

MKI67

Marker Of Proliferation Ki-67

PRKCA

Protein Kinase C Alpha

PDE1A

AK5

Adenylate Kinase

PPAP2B

LPP

HMG2

High Mobility Group AT-Hook 2

RAPGEF4

MAPK10

Phosphodiesterase 5A

PDE5A

H1.3 Linker Histone, Cluster Member

Mitogen-Activated Protein Kinase 10

ACTG2

Formin 1

FMN1

ANLN

Ribosomal Protein S6 Kinase A2

RPS6KA2

MKI67

Marker Of Proliferation Ki-67

PRKCA

Protein Kinase C Alpha

PDE1A

AK5

Adenylate Kinase

PPAP2B

LPP

HMG2

High Mobility Group AT-Hook 2

RAPGEF4

MAPK10

Phosphodiesterase 5A

PDE5A

H1.3 Linker Histone, Cluster Member

Mitogen-Activated Protein Kinase 10

ACTG2

</

# DNA replication / Chromatin Remodeling / Cell Division Control

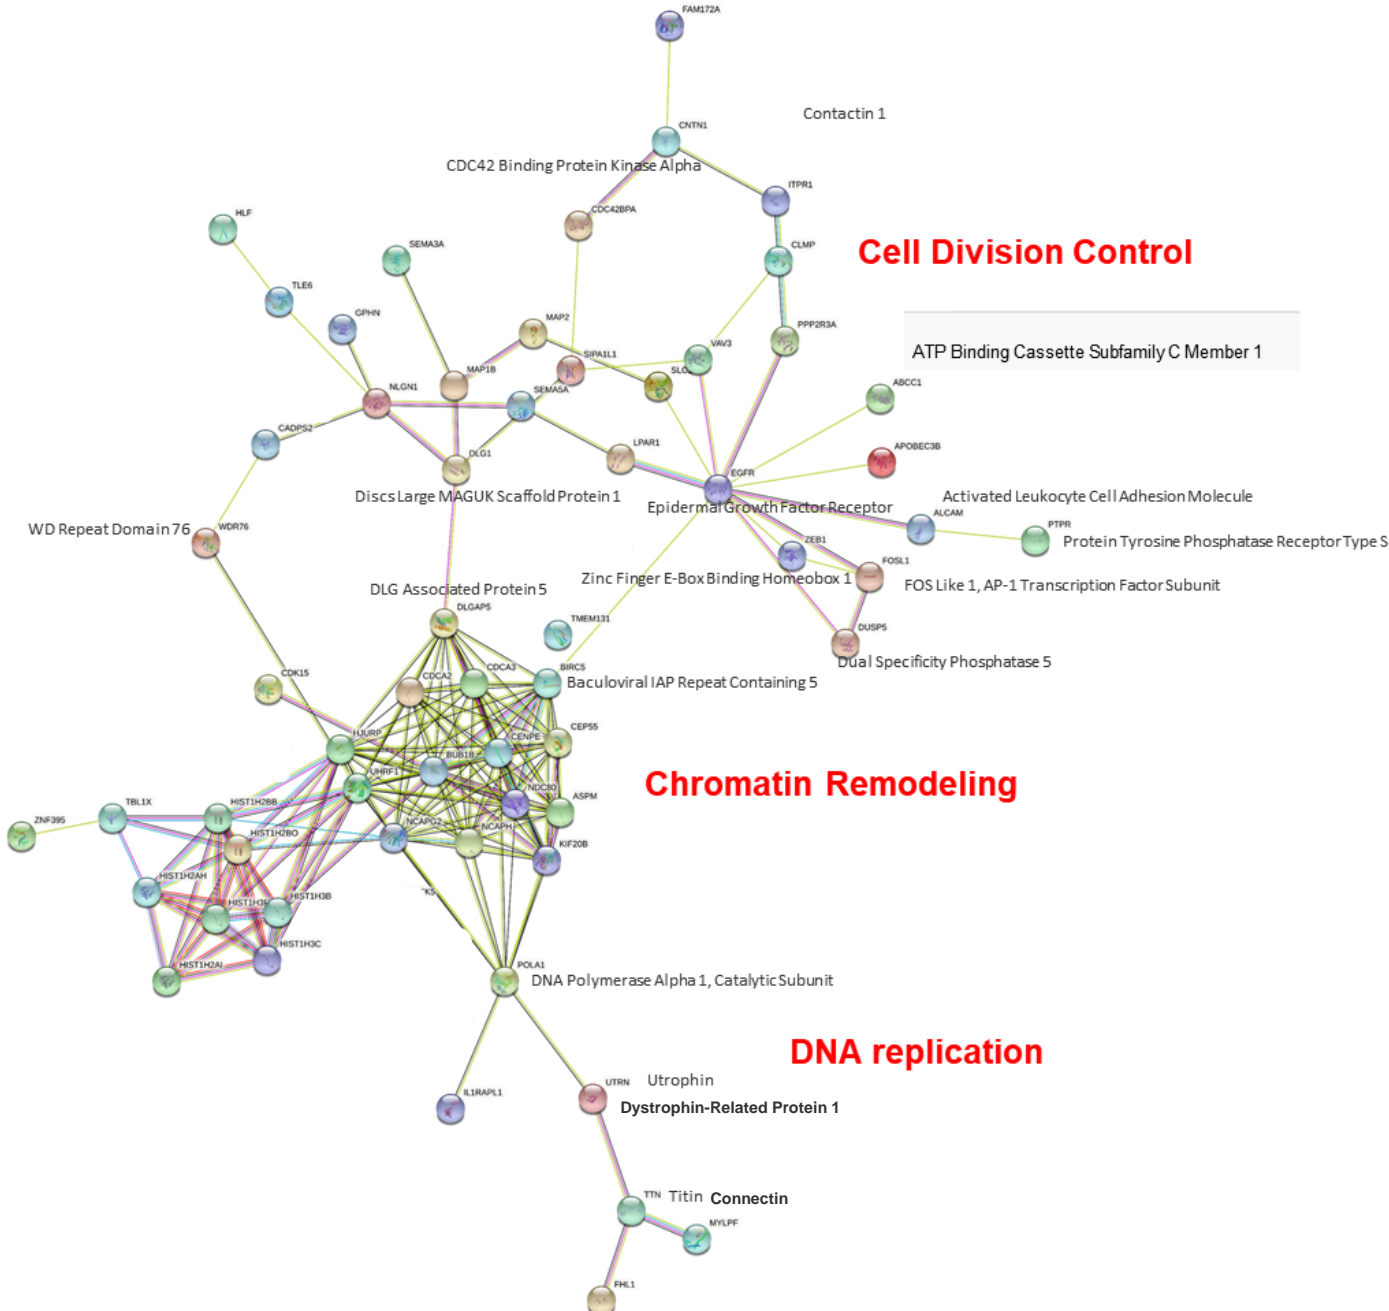

## Supple. Figure S2

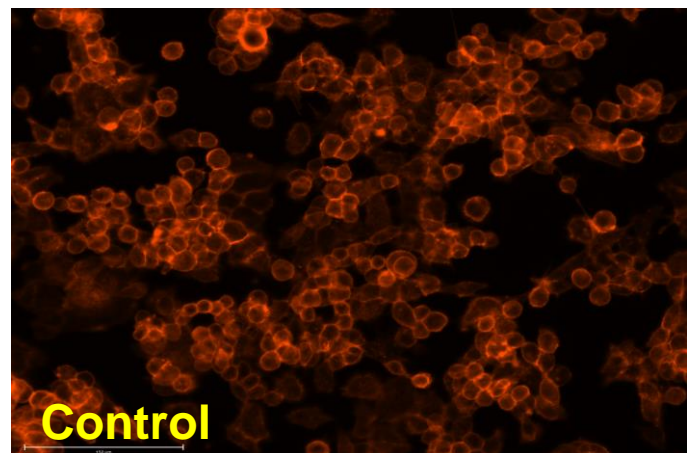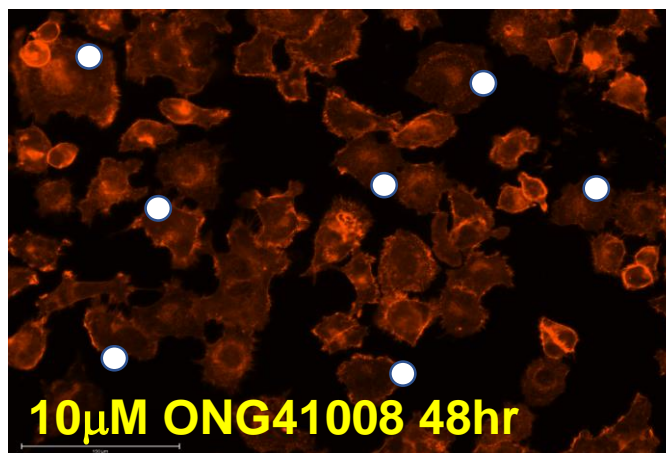

PANC1

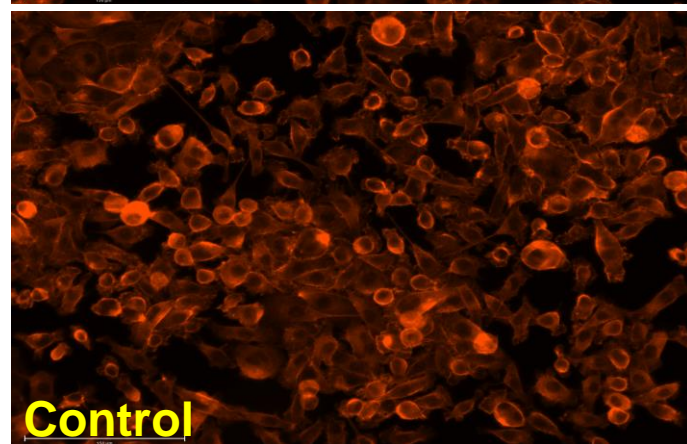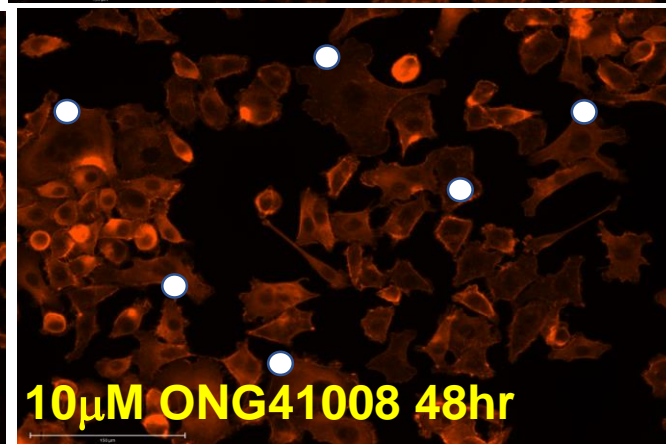

PC3

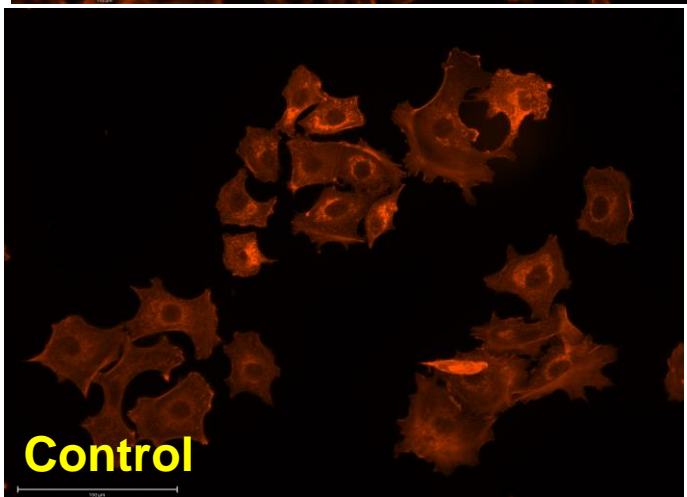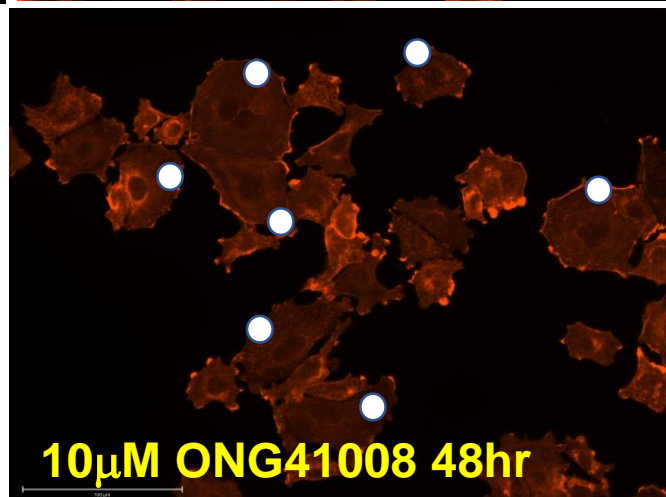

MCF7



**A)****A549(p53) 24h**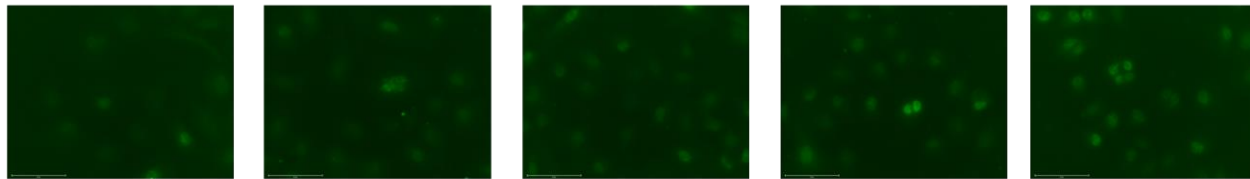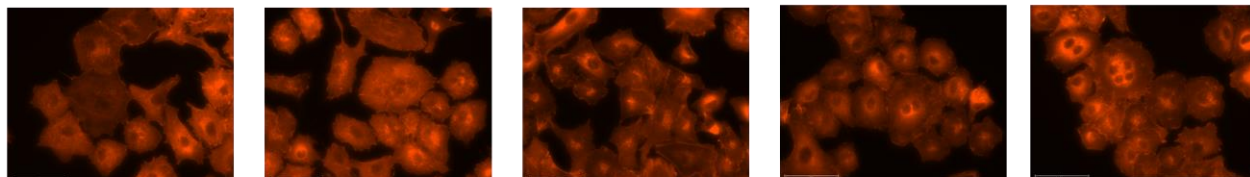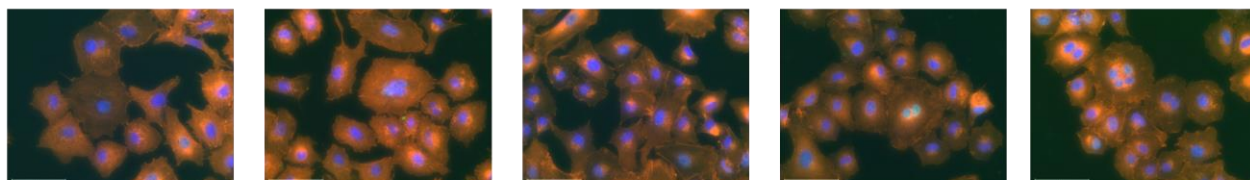

Control

ONG41008 1uM

ONG41008 5uM

ONG41008 10uM

ONG41008 20uM

**B)****A549(p21) 24h**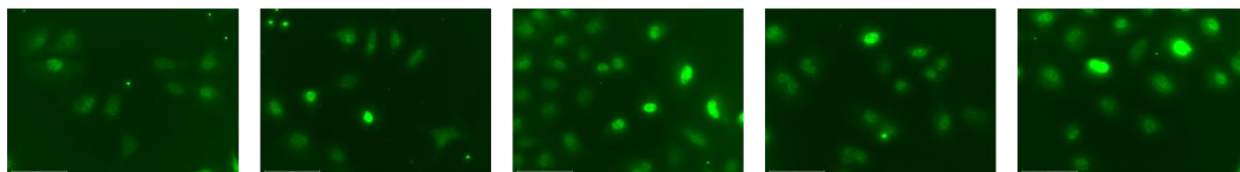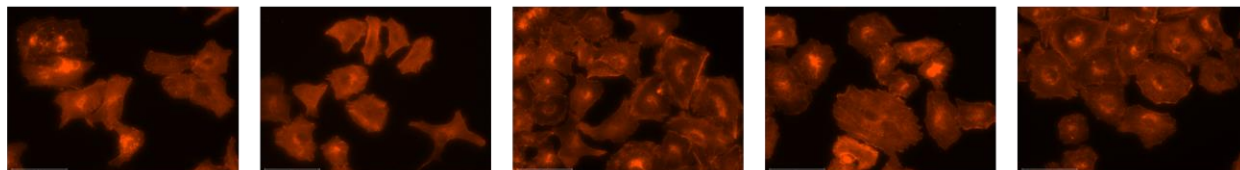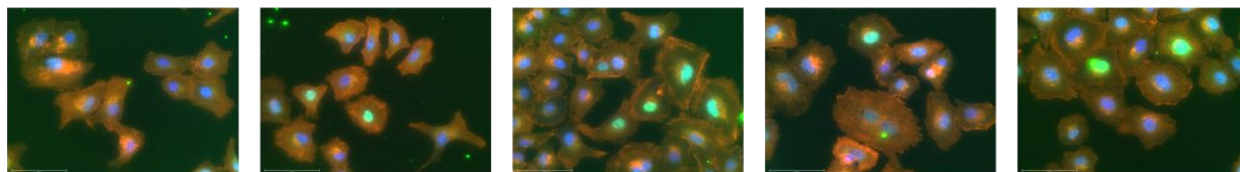

Control

ONG41008 1uM

ONG41008 5uM

ONG41008 10uM

ONG41008 20uM

**C)****A549(p16) 24h**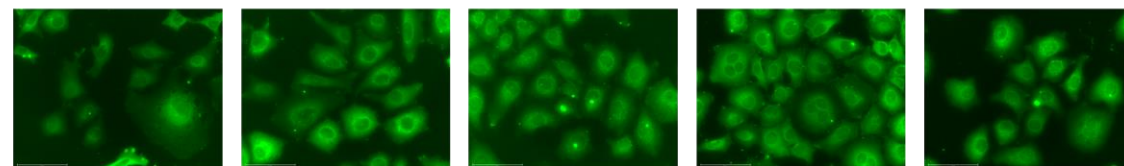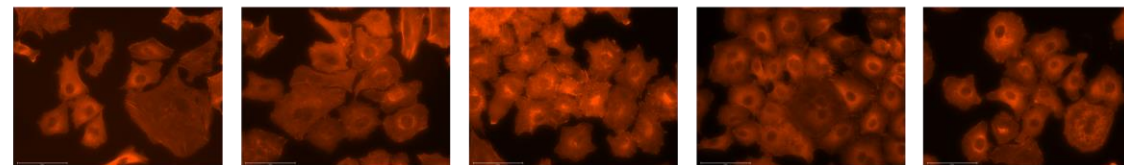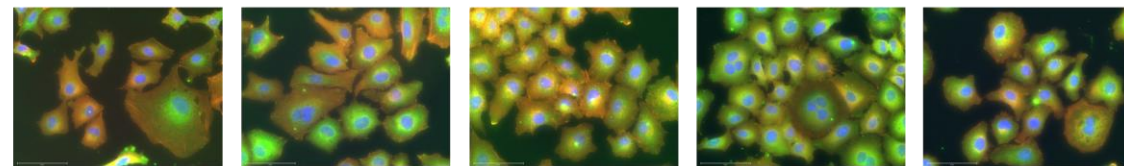

Control

ONG41008 1uM

ONG41008 5uM

ONG41008 10uM

ONG41008 20uM

**Supple. Figure S4**

A549 (72h)

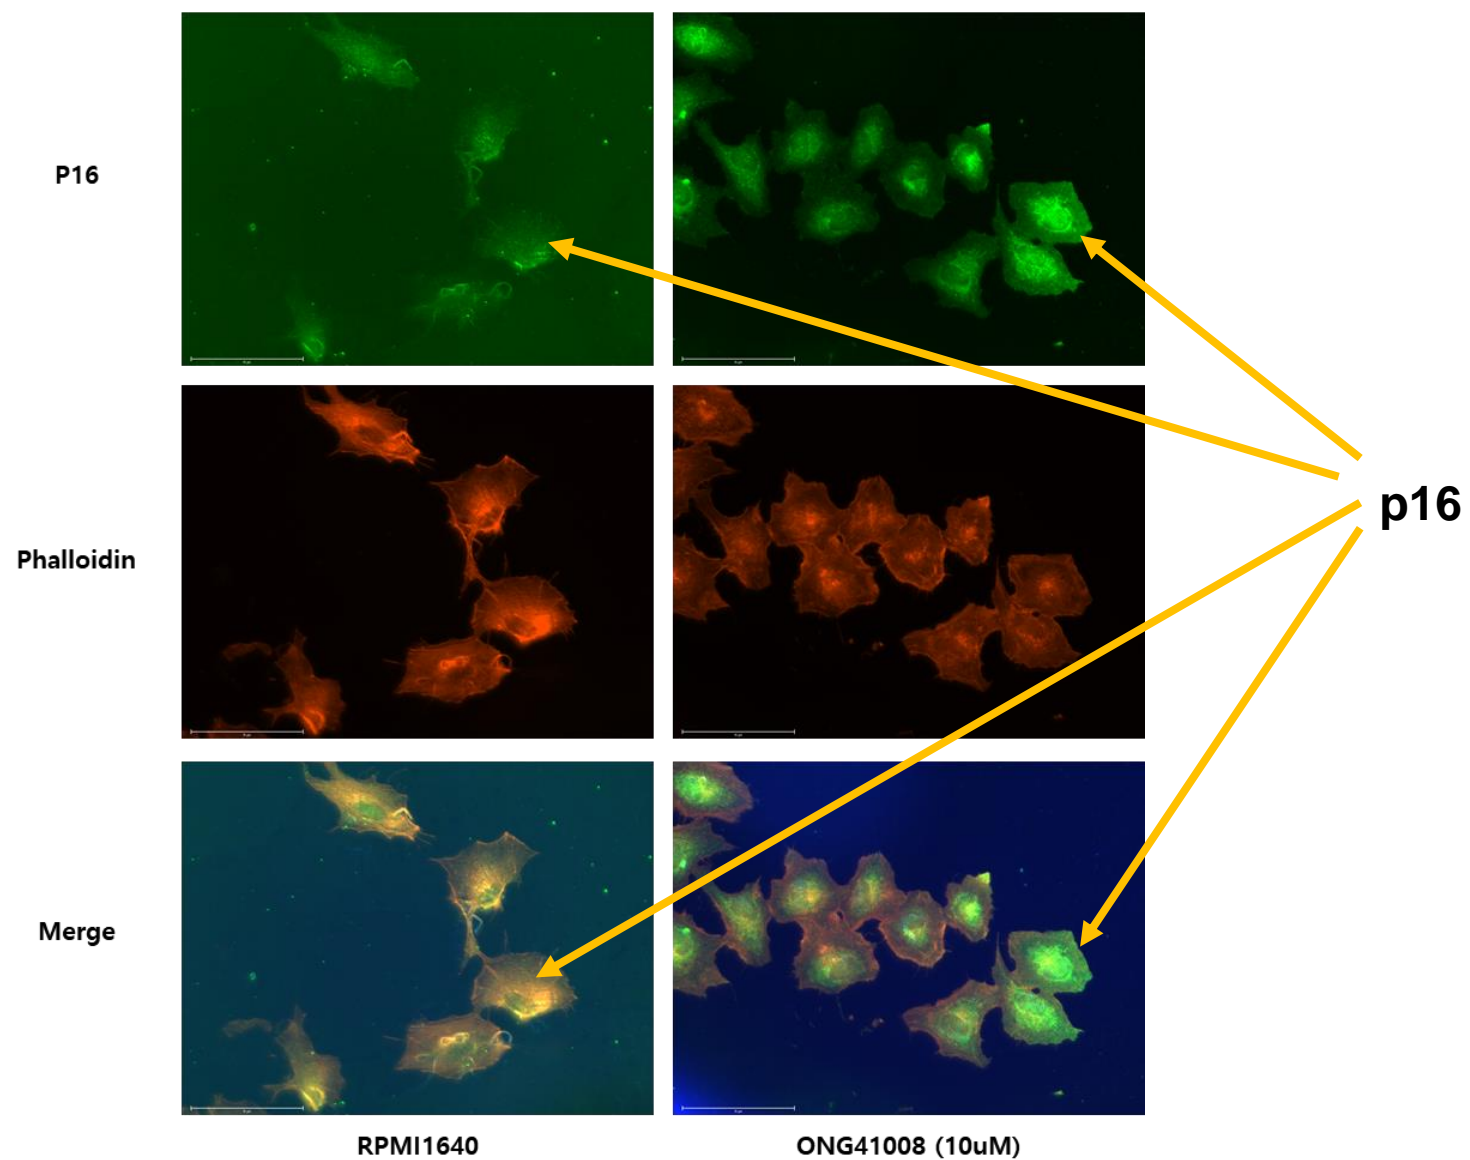

Supple. Figure S5

**A)**

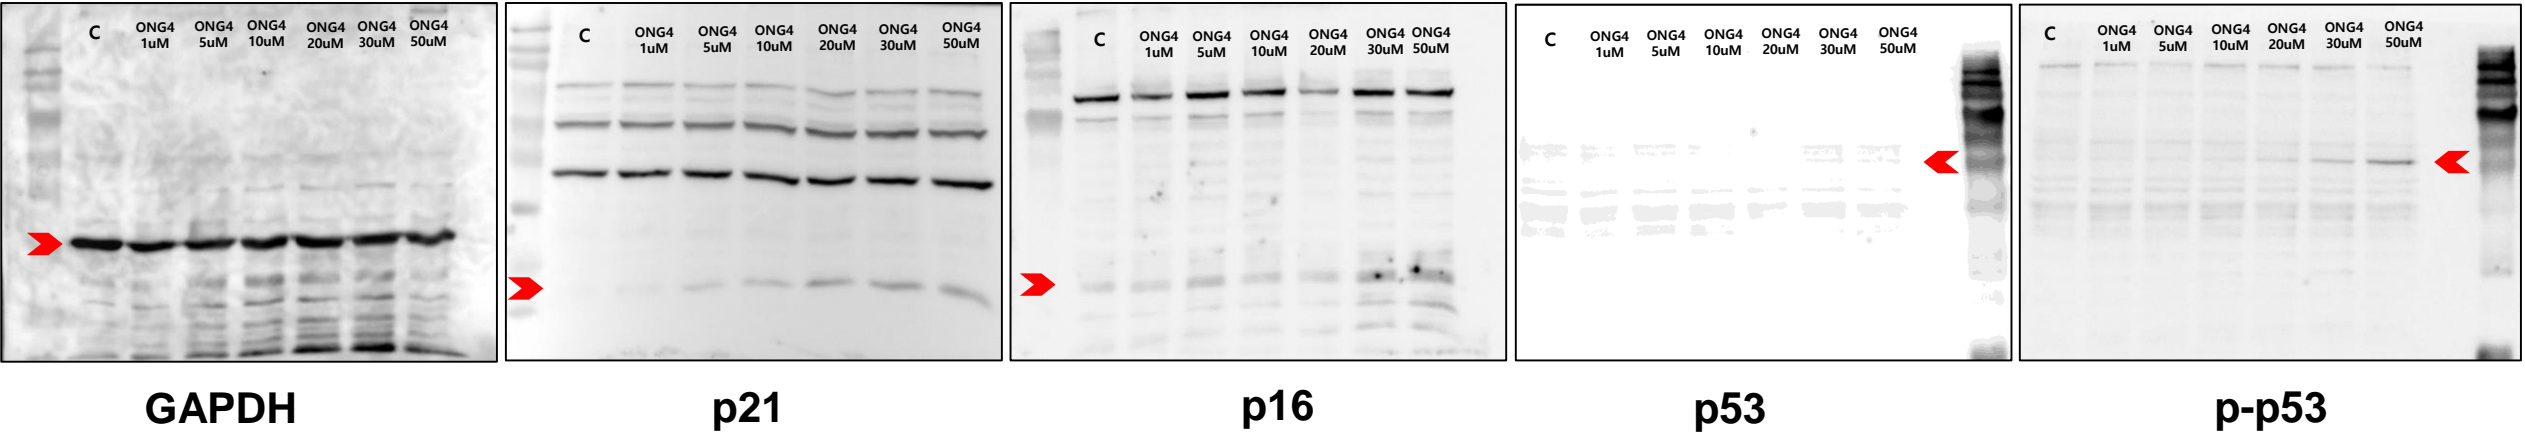

**B)**

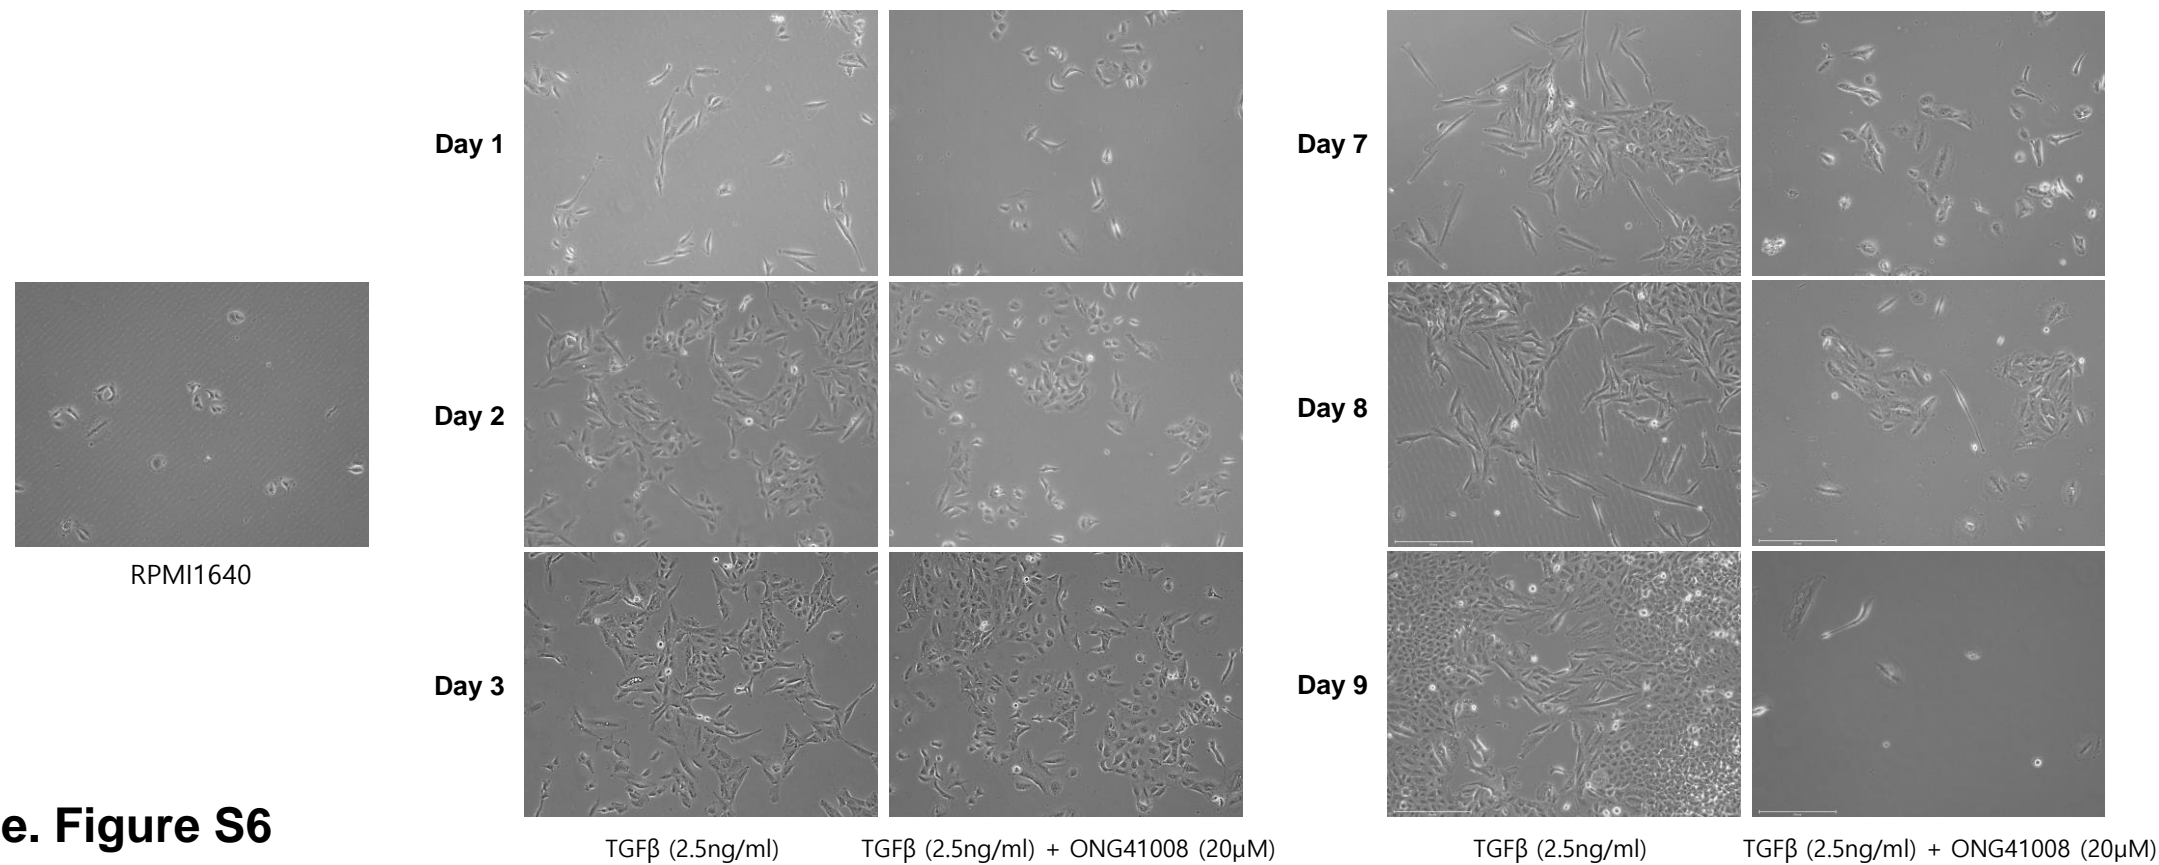

**Supple. Figure S6**
